# Supplementary material for: In-depth characterization of self-healing polymers based on π–π nteractions
Source: publisher site journal article supplement (doi:10.3762/bjoc.17.166), 2021-09-29
Supplement: Additional file 1 [file 1860-5397-17-166-S1.pdf]

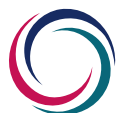

## Supporting Information

for

### **In-depth characterization of self-healing polymers based on $\pi$ - $\pi$ interactions**

Josefine Meurer, Julian Hniopek, Johannes Ahner, Michael Schmitt, Jürgen Popp, Stefan Zechel, Kalina Peneva and Martin D. Hager

*Beilstein J. Org. Chem.* doi:

## Additional data

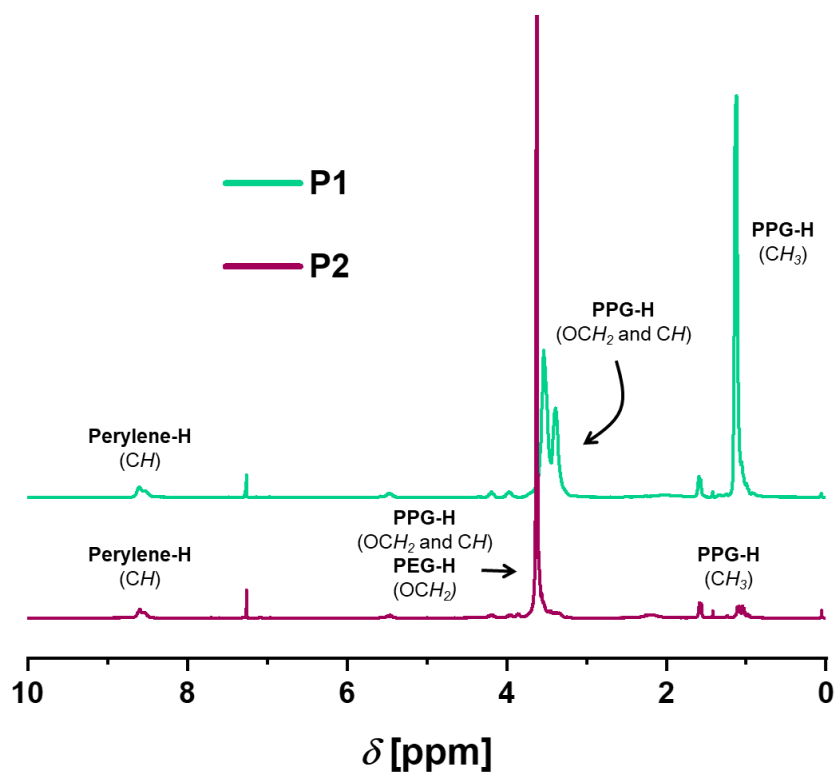

**Figure S1:**  $^1\text{H}$  NMR spectra of **P1** and **P2** (300 MHz,  $\text{CDCl}_3$ ).

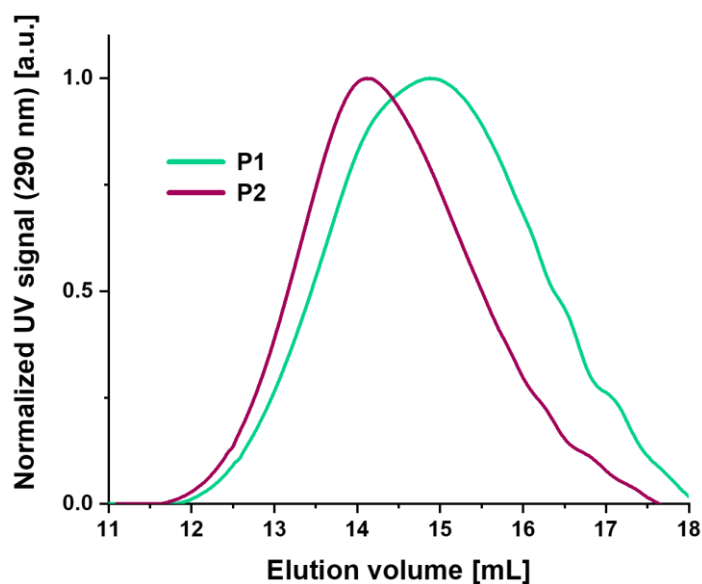

**Figure S2:** SEC-traces of the polymers **P1** and **P2** (chloroform/isopropanol/triethylamine [94/2/4]) revealing a molar mass of  $M_n = 11,400$  g/mol for **P1** and  $M_n = 17,400$  g/mol for **P2**.

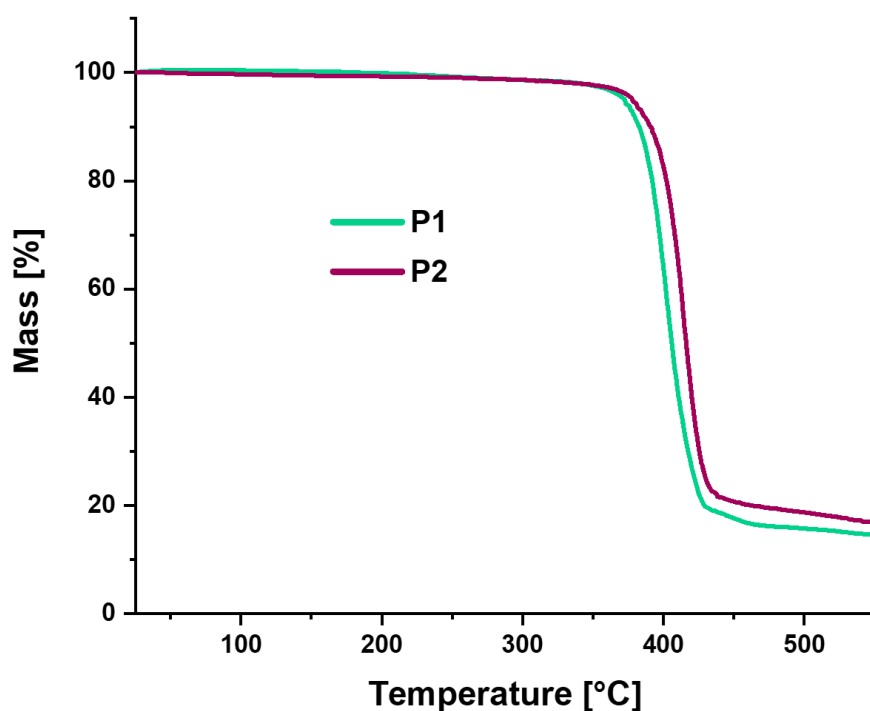

**Figure S3:** TGA analysis of **P1** and **P2** (heating rate 20 Kmin<sup>-1</sup>).

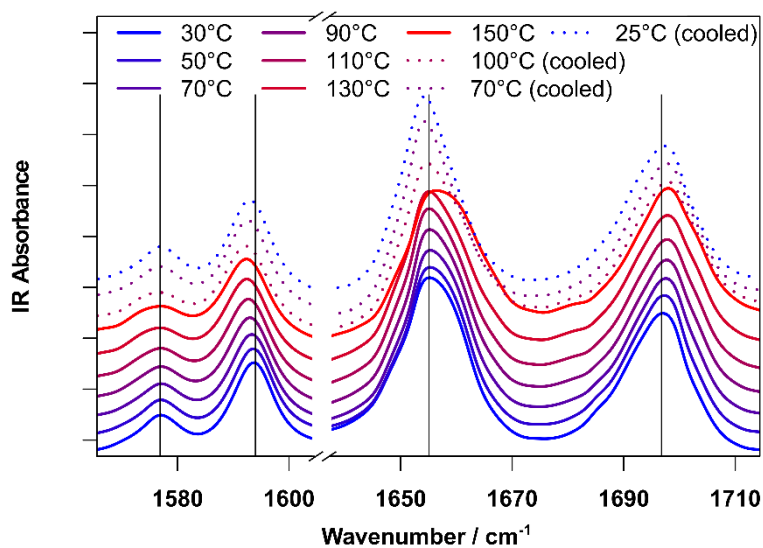

**Figure S4:** Temperature dependent IR spectra of **P2** drop casted on KBr in the C=C (1570–1605 cm<sup>-1</sup>) and C=O stretching region (1640–1710 cm<sup>-1</sup>). During heating, slight shifts in the position of all bands (1578 cm<sup>-1</sup>: +0.2 cm<sup>-1</sup>; 1595: -1.5 cm<sup>-1</sup>; 1655 cm<sup>-1</sup>: +0.4 cm<sup>-1</sup>; 1696: +1.6 cm<sup>-1</sup>). These shifts are partially reversed while cooling the

polymer, indicating a reversible cause for the shifts. Additionally, all bands exhibit broadening during heating, especially noticeable at 150 °C, indicating a broader distribution of species contributing to the IR spectrum

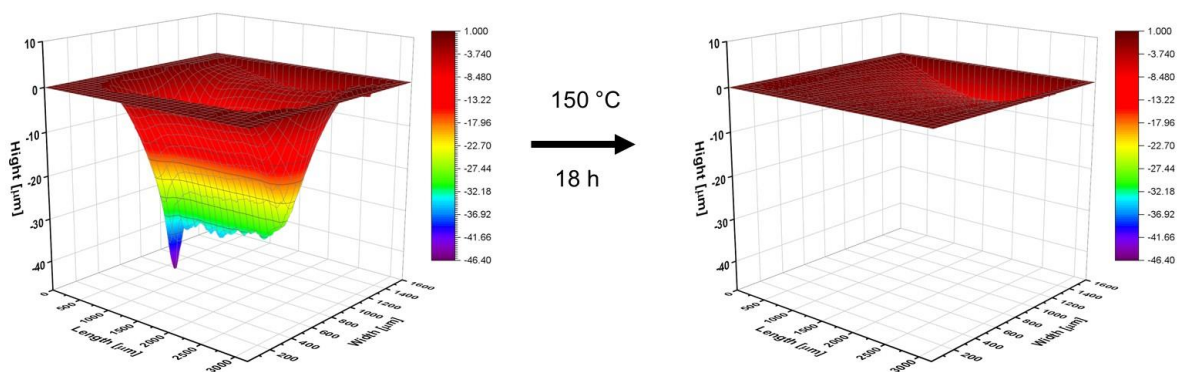

**Figure S5:** Self-healing of scratch two of **P1** at 150 °C for 18 h.

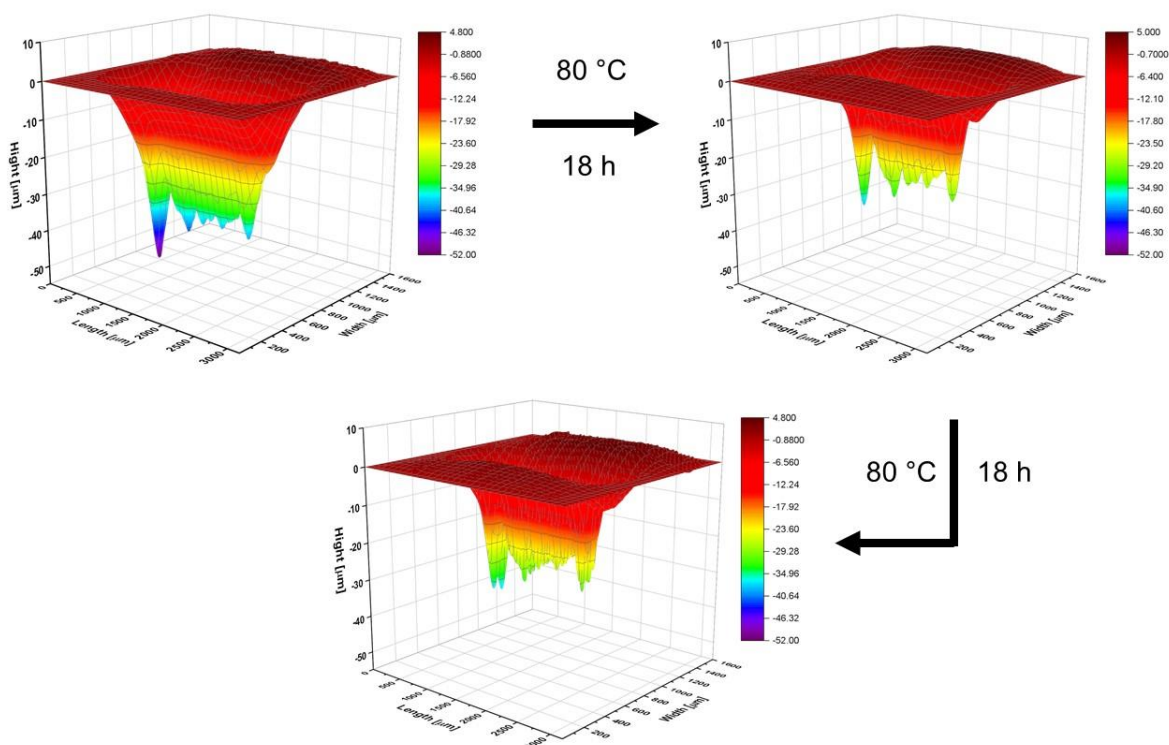

**Figure S6:** Self-healing of scratch three of **P1** at 80 °C for 18 h and additional 18 h.

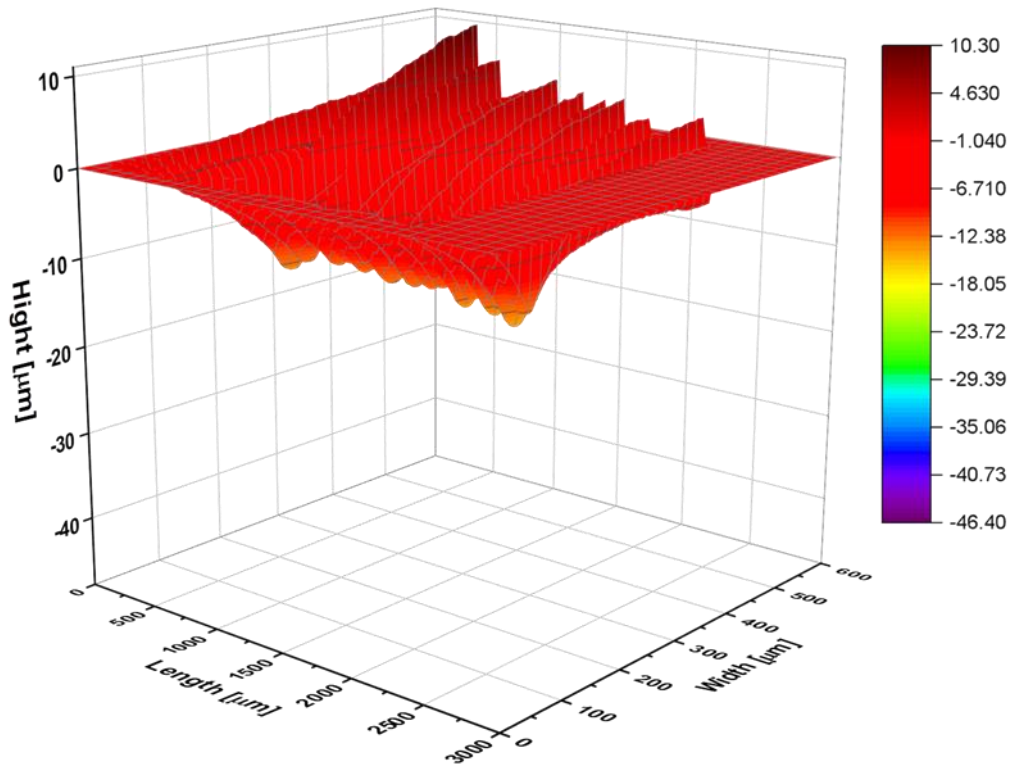

**Figure S7:** Analysis of the scratch of **P2** after indentation.

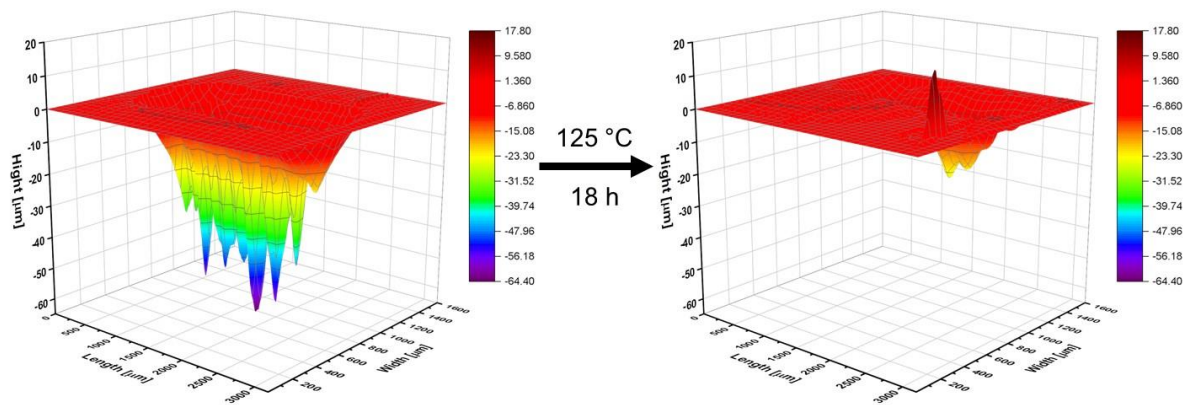

**Figure S8:** Self-healing of scratch three of **P1** at 125 °C for 18 h.
